# Supplementary material for: Altered expression pattern of immune response-related genes and isoforms in hypersensitivity pneumonitis lung fibroblasts
Source: PubMed Central journal article supplement — Sci Rep. 2024 Oct 14;14:24002. doi: 10.1038/s41598-024-74267-x (PMC11473681; doi:10.1038/s41598-024-74267-x), 2024-10-14
Supplement: 41598_2024_74267_MOESM1_ESM.pdf [file 41598_2024_74267_MOESM1_ESM.pdf]

|           |                                                              |     |  |
|-----------|--------------------------------------------------------------|-----|--|
| <b>a.</b> |                                                              |     |  |
| AGERv7    | -----TRRGGANCR-----LCGRIRAGNSSPGDGRPGDSR----                 | 303 |  |
| AGERv5    | WPPIPATGPRKAVLSASAS---SNQARRGQLQVRGLIKSG-----                | 321 |  |
| AGERv8    | -----NQARRGQLQVRGLIKSG-----                                  | 291 |  |
| AGERv3    | VLILPEIGPDQGTYSVATHSSHGPQESRAVSISIIPEGEEPTAGSVGSGSLGTLALA    | 330 |  |
| AGERv1    | VLILPEIGPDQGTYSVATHSSHGPQESRAVSISIIPEGEEPTAGSVGSGSLGTLALA    | 344 |  |
| AGERv2    | VLILPEIGPDQGTYSVATHSSHGPQESRAVSISIIPEGEEPTAGSVGSGSLGTLALA    | 360 |  |
| AGERv4    | VLILPEIGPDQGTYSVATHSSHGPQESRAVSISIIPEGEEPTAGEGFD---KVREA     | 356 |  |
| AGERv6    | VLILPEIGPDQGTYSVATHSSHGPQESRAVSISIIPEGEEPTAGEGFD---KVREA     | 340 |  |
| AGERv9    | VLILPEIGPDQGTYSVATHSSHGPQESRAVSISIIPEGEEPTAGEGFD---KVREA     | 340 |  |
|           | *, *                                                         |     |  |
| <b>b.</b> |                                                              |     |  |
| IFNGR1v2  | -----MLLKSPEN--SLLQFQFKYGVPTPTNVTIESYNMNPVYWEYQIMPQVPVFT     | 50  |  |
| IFNGR1v1  | MALLFLLPLVMQVSRAMETADLGPSSVPTPTNVTIESYNMNPVYWEYQIMPQVPVFT    | 60  |  |
| IFNGR1v3  | -----MNPVYWEYQIMPQVPVFT-----                                 | 19  |  |
|           | *****                                                        |     |  |
| <b>d.</b> |                                                              |     |  |
| IFNGR2v1  | MRPTLLWSLLLLLVFAAAAAAPPAQLTLETYQEWNCNSAATHDPLSQLPAPQHPKIRLY  | 60  |  |
| IFNGR2v2  | MRPTLLWSLLLLLVFAAAAAAPP-----DPLSQLPAPQHPKIRLY                | 41  |  |
|           | *****                                                        |     |  |
| <b>e.</b> |                                                              |     |  |
| IL17RcV1  | MPVPWFLLSLALGRSPVVLSELERLVGPQDATHCSPVSELPWGEERLVQFLAQQLSLA   | 60  |  |
| IL17RcV9  | MPVPWFLLSLALGRSPVVLSELERLVGPQDATHCSP-----                    | 35  |  |
|           | *****                                                        |     |  |
| <b>f.</b> |                                                              |     |  |
| IL17RcV1  | PVTAATARTALSGLSGADGRREERGRKSWVCLSLGGSGNTEPQKGLSCLRWSDILCL    | 120 |  |
| IL17RcV9  | -----GLSCLRWSDILCL-----                                      | 49  |  |
|           | *****                                                        |     |  |
| IL17RcV1  | PGDIVPAPGVPVLAHLQTELVLRQKQETDCDCLRVAVHLAVHNEEPEDEKFGGAA      | 180 |  |
| IL17RcV9  | PGDIVPAPGVPVLAHLQTELVLRQKQETDCDCLRVAVHLAVHA-----             | 94  |  |
|           | *****                                                        |     |  |
| IL17RcV1  | DSGVVEPRNASLQAQVLSFQAYPTARCVLLVQVPAALVQFGVSGVSWYDCFEAALGS    | 240 |  |
| IL17RcV9  | -----SLQAQVLSFQAYPTARCVLLVQVPAALVQFGVSGVSWYDCFEAALGS         | 144 |  |
|           | *****                                                        |     |  |
| IL17RcV1  | EVR IWSYTPQRYEKLNHTQQLPDCRGLVWNSIPSCWALPWLNVSDAGDNVHLVNVSE   | 300 |  |
| IL17RcV9  | EVR IWSYTPQRYEKLNHTQQLP-----ALPWLNVSDAGDNVHLVNVSE            | 189 |  |
|           | *****                                                        |     |  |
| <b>g.</b> |                                                              |     |  |
| MYD88v5   | IRQLETQADPTGRLLDAAWQGRPGASVGRLLLELLTKLGRDDVLELGPISGAAGMMLSLM | 120 |  |
| MYD88v2   | IRQLETQADPTGRLLDAAWQGRPGASVGRLLLELLTKLGRDDVLELGPISGAAGMMLSLM | 120 |  |
| MYD88v3   | IRQLETQADPTGRLLDAAWQGRPGASVGRLLLELLTKLGRDDVLELGPISGAAGMMLSLM | 108 |  |
|           | *****                                                        |     |  |
| MYD88v5   | ITCRARNVTSRPNLHSAASLQVPIRS-----                              | 146 |  |
| MYD88v2   | QEEAEKP---LQVAADVSSPRTAELAGITLDDPLGHMPERFDAFICVCPDIOFVQE     | 177 |  |
| MYD88v3   | -----IGHMPERFDAFICVCPDIOFVQE-----                            | 132 |  |
|           | *****                                                        |     |  |
| MYD88v5   | MIRQLEQTNVRLKLCVSDRDLVPGTCVWSIASLEIEKRCRRMNVVSDVYLSQKECDFQT  | 146 |  |
| MYD88v2   | MIRQLEQTNVRLKLCVSDRDLVPGTCVWSIASLEIEKRCRRMNVVSDVYLSQKECDFQT  | 237 |  |
| MYD88v3   | MIRQLEQTNVRLKLCVSDRDLVPGTCVWSIASLEIEKRCRRMNVVSDVYLSQKECDFQT  | 192 |  |
|           | *****                                                        |     |  |
| MYD88v5   | -----                                                        | 146 |  |
| MYD88v2   | KFALSLSPGAHQKRLIPIKYKAMKKEFPSILRFITVCDYTNPCTKSWFTRLAKALSPL   | 296 |  |
| MYD88v3   | KFALSLSPGAHQKRLIPIKYKAMKKEFPSILRFITVCDYTNPCTKSWFTRLAKALSPL   | 251 |  |
|           | *****                                                        |     |  |
| <b>h.</b> |                                                              |     |  |
| PDGFRv1v2 | DIQRSLYDRFASYKKSMLGWAGVGTGRCQRLNSHAQAQALLAGRPLLSGLP-----     | 807 |  |
| PDGFRv1v3 | DIORSLYDRFASYKKSMLDSEVKNL-----LSDDNSE---GLTLDDLSTFYOVARG     | 818 |  |
|           | *****                                                        |     |  |
| PDGFRv1v2 | -----                                                        | 807 |  |
| PDGFRv1v3 | MEFLASKNCVHRDLAARNVLLAQKIVKICDFGLARDIMHDSNVVSKGSTFLPVKWMAP   | 878 |  |
|           | *****                                                        |     |  |
| <b>i.</b> |                                                              |     |  |
| PDGFRv1v2 | MRLPGAMPALALKEGELLSSLLLELPQISQGLVWTPPGPELVNVSSTFVTCSGSAPV    | 60  |  |
| PDGFRv1v3 | -----                                                        | 0   |  |
|           | *****                                                        |     |  |
| PDGFRv1v2 | VWERMSEPPQEMAKAQDGTSSVLTNLTLGLDTGEYFCHNDSRGLTDERKRLYIFV      | 120 |  |
| PDGFRv1v3 | ---MSQEPPEMAKQDGTSSVLTNLTLGLDTGEYFCHNDSRGLTDERKRLYIFV        | 56  |  |
|           | *****                                                        |     |  |
| PDGFRv1v2 | PDPTVGLFNDAAEELFIFLTEITEITIPCRVTDPLVLTLEHKKGDVALPVPYDHRGFS   | 180 |  |
| PDGFRv1v3 | PDPTVGLFNDAAEELFIFLTEITEITIPCRVTDPLVLTLEHKKGDVALPVPYDHRGFS   | 116 |  |
|           | -----MITNVAFLVSLRTEATSAPK-----                               | 21  |  |
|           | :*::*: : : *                                                 |     |  |
| PDGFRv1v2 | GIFEDRSYICKTTIGDREVDSDAYVYRLQVSSINVSNAVQTVVRQGENITLMCIVIGN   | 240 |  |
| PDGFRv1v3 | GIFEDRSYICKTTIGDREVDSDAYVYRLQVSSINVSNAVQTVVRQGENITLMCIVIGN   | 176 |  |
|           | --LGTGRWILMPTMSTDSRVSPLSGLMRSVSSINVSNAVQTVVRQGENITLMCIVIGN   | 79  |  |
|           | : : * : * : * : : *****                                      |     |  |
| <b>j.</b> |                                                              |     |  |
| TGFB1v1   | TTDKVIHNSMCIAEIDLIPDRPFVPCAPSSKTSVTTTYCCNQDHCNIEIPLTT---VK   | 116 |  |
| TGFB1v3   | TTDKVIHNSMCIAEIDLIPDRPFVPCAPSSKTSVTTTYCCNQDHCNIEIPLTTGPFVSK  | 120 |  |
| TGFB1v2   | TTDKVIHNSMCIAEIDLIPDRPFVPCAPSSKTSVTTTYCCNQDHCNIEIPLTT-----   | 114 |  |
|           | *****                                                        |     |  |
| TGFB1v1   | SSPGLGPVLEAAVIAGPVCVCSILMLMVIYCHNRTVIHHRVNEEDPSLDRPFISEGTT   | 176 |  |
| TGFB1v3   | SSPGLGPVLEAAVIAGPVCVCSILMLMVIYCHNRTVIHHRVNEEDPSLDRPFISEGTT   | 180 |  |
| TGFB1v2   | SSPGLGPVLEAAVIAGPVCVCSILMLMVIYCHNRTVIHHRVNEEDPSLDRPFISEGTT   | 114 |  |
|           | *****                                                        |     |  |
| TGFB1v1   | LKDLIYDMTTSGSGSLPLLQRTIARTIVLQESIGKGRFGEVWRGKWRGEEVAVKIFSS   | 236 |  |
| TGFB1v3   | LKDLIYDMTTSGSGSLPLLQRTIARTIVLQESIGKGRFGEVWRGKWRGEEVAVKIFSS   | 240 |  |
| TGFB1v2   | -----GLPLLQRTIARTIVLQESIGKGRFGEVWRGKWRGEEVAVKIFSS            | 159 |  |
|           | *****                                                        |     |  |
| <b>k.</b> |                                                              |     |  |
| TGFB2v1   | MGRGLLRGLWPLHIVLWTRIASTIPPHVQKSDVEMEAQKDEIICPCNRTAHLRHINND   | 60  |  |
| TGFB2v2   | MGRGLLRGLWPLHIVLWTRIASTIPPHVQK-----VNIND                     | 35  |  |
|           | *****                                                        |     |  |

**Figure S1. Splicing isoform amino acid alignments of target genes studied.** Confirmed RefSeq sequences (NM\_XXXX) were aligned using the program Clustal X.
