# Supplementary material for: Altered expression pattern of immune response-related genes and isoforms in hypersensitivity pneumonitis lung fibroblasts
Source: PubMed Central journal article supplement — Sci Rep. 2024 Oct 14;14:24002. doi: 10.1038/s41598-024-74267-x (PMC11473681; doi:10.1038/s41598-024-74267-x), 2024-10-14
Supplement: 41598_2024_74267_MOESM2_ESM.pdf [file 41598_2024_74267_MOESM2_ESM.pdf]

**A.**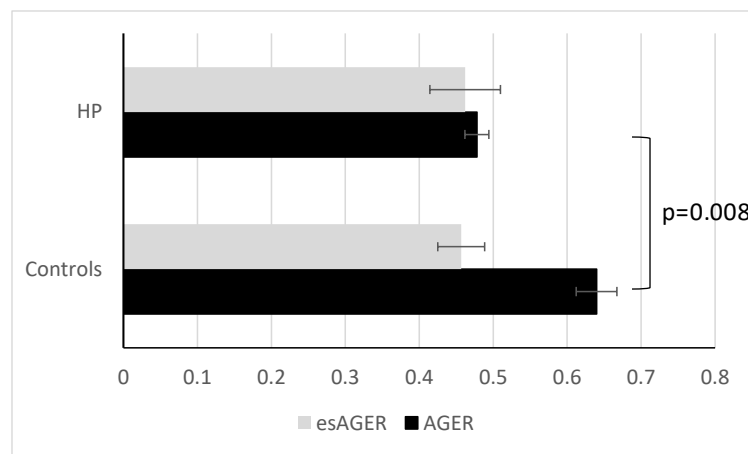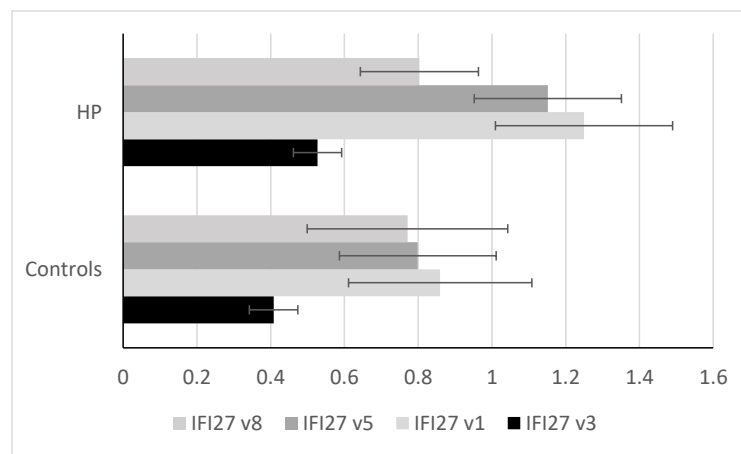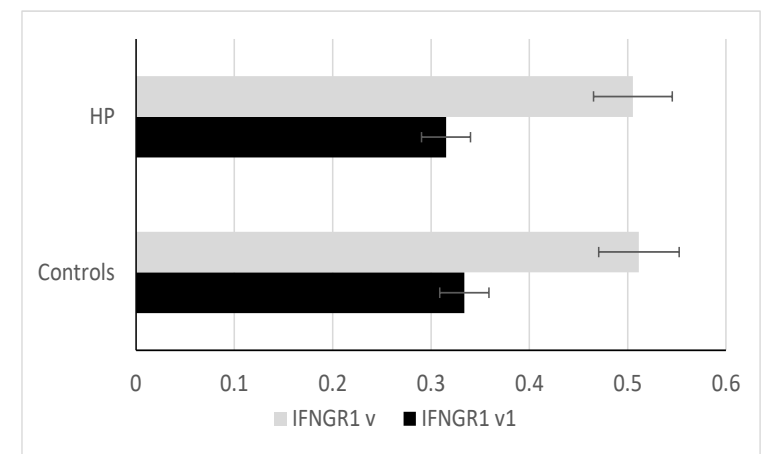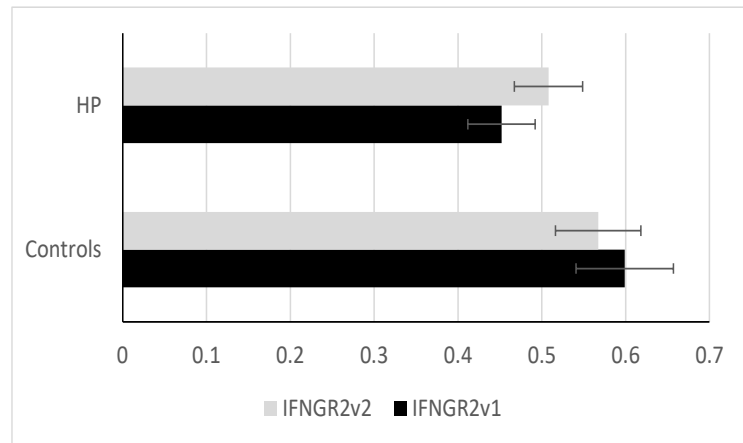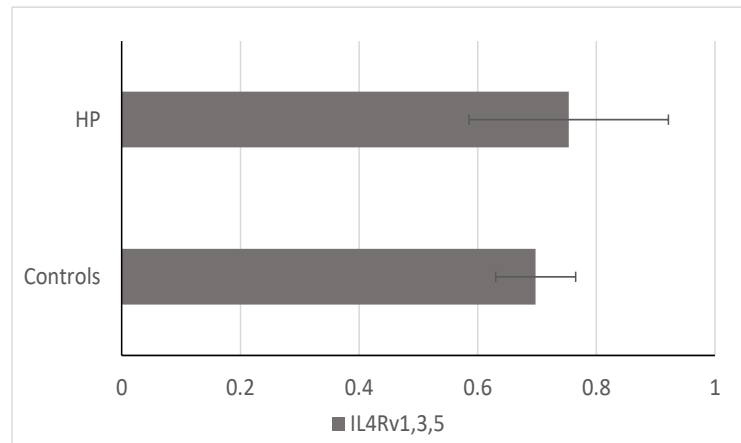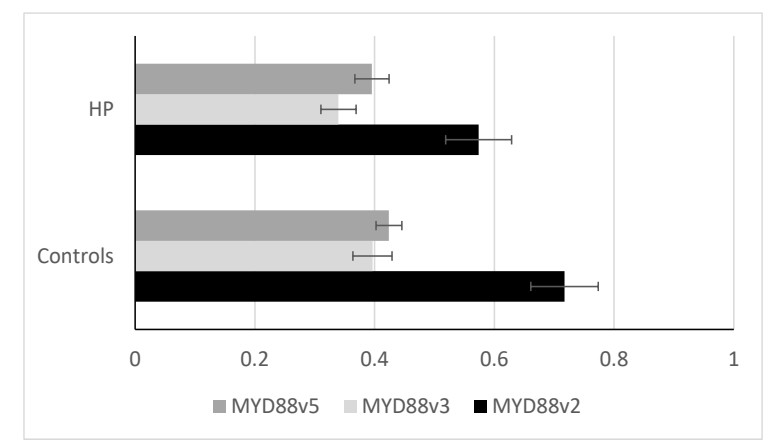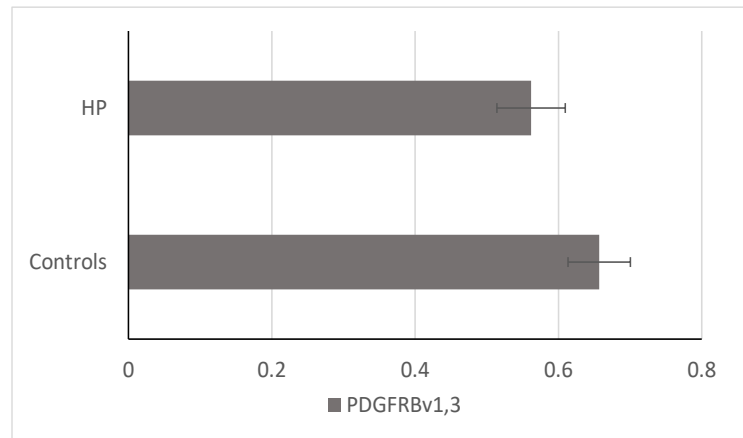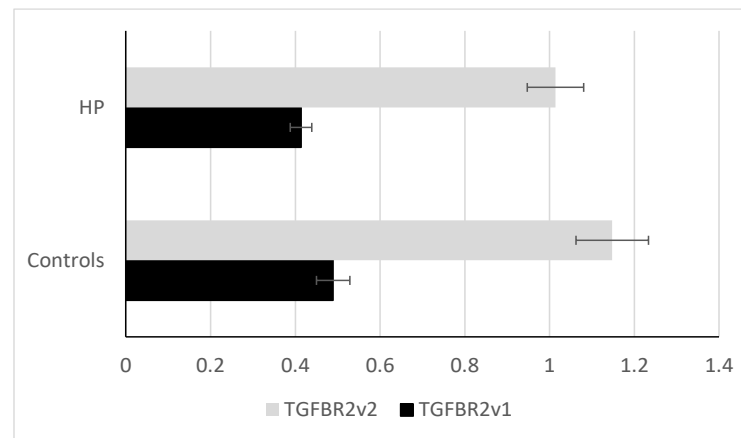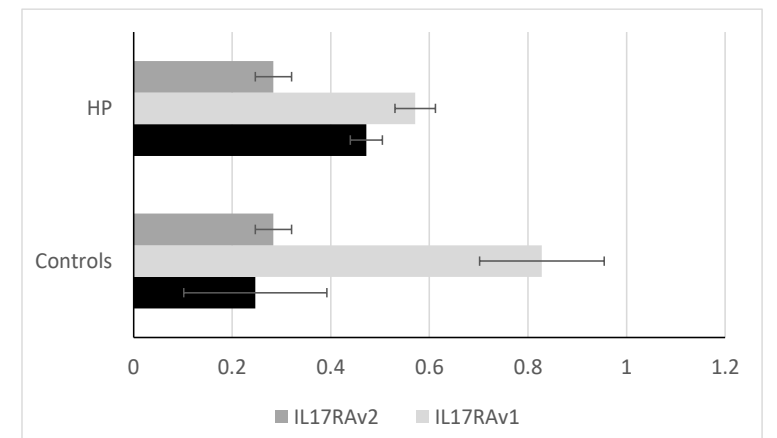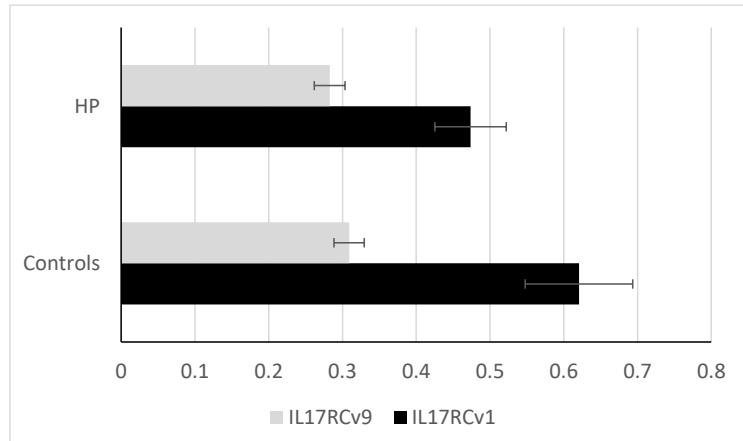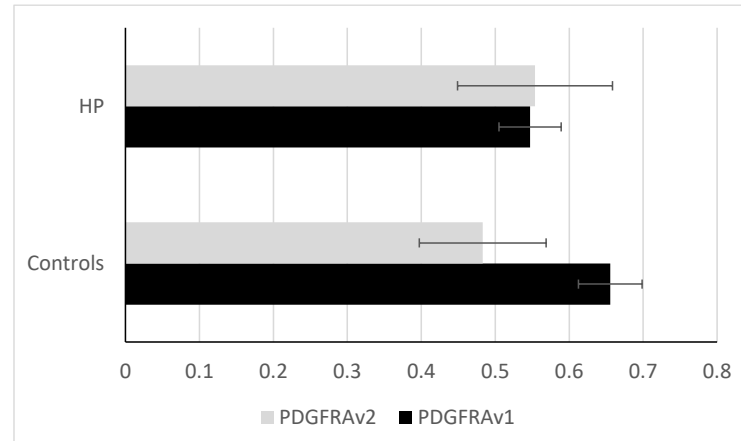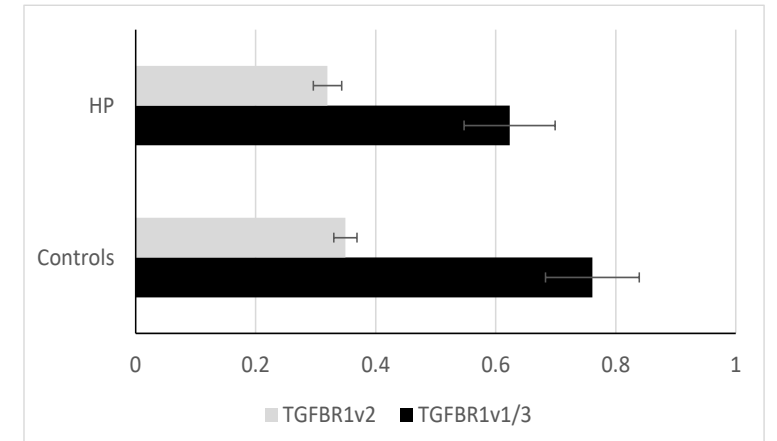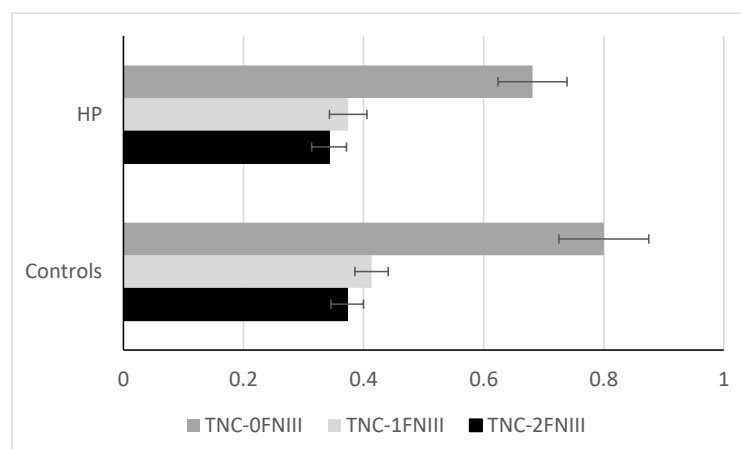

**B.**

| Gen name | Gen ID (Genbank) | Amplicon size (bp) | Samples   |           |           |            |     |     |     |     |
|----------|------------------|--------------------|-----------|-----------|-----------|------------|-----|-----|-----|-----|
|          |                  |                    | Control 1 | Control 2 | Control 3 | Controls 4 | HP1 | HP2 | HP3 | HP4 |
| IFI27    | 3429             | 460                |           |           |           |            |     |     |     |     |
|          |                  | 406                |           |           |           |            |     |     |     |     |
|          |                  | 361                |           |           |           |            |     |     |     |     |
|          |                  | 236                |           |           |           |            |     |     |     |     |
| IFNGR1   | 3459             | 1457               |           |           |           |            |     |     |     |     |
|          |                  | 1,100              |           |           |           |            |     |     |     |     |
| IFNGR2   | 3460             | 490                |           |           |           |            |     |     |     |     |
|          |                  | 125                |           |           |           |            |     |     |     |     |
| IL17RA   | 23765            | 265                |           |           |           |            |     |     |     |     |
|          |                  | 173                |           |           |           |            |     |     |     |     |
| IL17RC   | 84818            | 345                |           |           |           |            |     |     |     |     |
|          |                  | 270                |           |           |           |            |     |     |     |     |
| IL4R     | 3566             | 622                |           |           |           |            |     |     |     |     |
| MyD88    | 4615             | 366                |           |           |           |            |     |     |     |     |
|          |                  | 231                |           |           |           |            |     |     |     |     |
|          |                  | 50                 |           |           |           |            |     |     |     |     |
| PDGFRA   | 5156             | 420                |           |           |           |            |     |     |     |     |
|          |                  | 397                |           |           |           |            |     |     |     |     |
| PDGFRB   | 5159             | 915                |           |           |           |            |     |     |     |     |
| AGER     | 177              | 183                |           |           |           |            |     |     |     |     |
|          |                  | 139                |           |           |           |            |     |     |     |     |
| TGFB1    | 7046             | 762 and 773        |           |           |           |            |     |     |     |     |
|          |                  | 528                |           |           |           |            |     |     |     |     |
| TGFB2    | 7048             | 379                |           |           |           |            |     |     |     |     |
|          |                  | 284                |           |           |           |            |     |     |     |     |
| TNC      | 3371             | 643                |           |           |           |            |     |     |     |     |
|          |                  | 370                |           |           |           |            |     |     |     |     |
|          |                  | 97                 |           |           |           |            |     |     |     |     |
| HPRT1    | 3251             | 180                |           |           |           |            |     |     |     |     |

| Color code | % relative to HPRT1 |
|------------|---------------------|
|            | 0                   |
|            | 0.01-0.199          |
|            | 0.2-0.399           |
|            | 0.4-0.599           |
|            | 0.6-0.799           |
|            | 0.8-0.999           |
|            | 1-1.199             |
|            | 1.2-1.399           |

**Figure S2. Densitometry of alternatively expressed transcripts in HP and control fibroblasts.** (A) Isoform expression for each tested gene comparing control and HP samples. Error bars are the standard error. (B) Summary of the densitometric data for all genes, including the GenID and PCR product sizes. Due to the low signal, sample C3 of AGER was not included in the quantification (A). Statistical differences were assessed with the Mann-Whitney test.
