# Supplementary material for: Altered expression pattern of immune response-related genes and isoforms in hypersensitivity pneumonitis lung fibroblasts
Source: PubMed Central journal article supplement — Sci Rep. 2024 Oct 14;14:24002. doi: 10.1038/s41598-024-74267-x (PMC11473681; doi:10.1038/s41598-024-74267-x), 2024-10-14
Supplement: 41598_2024_74267_MOESM4_ESM.pdf [file 41598_2024_74267_MOESM4_ESM.pdf]

**Table S1.** Primer sequences for isoform variants.

| Primer name | Sequence                  | n  | GC % | Tm    | Location | Details                                                                                                                                                  | Type                                                |
|-------------|---------------------------|----|------|-------|----------|----------------------------------------------------------------------------------------------------------------------------------------------------------|-----------------------------------------------------|
| AGER-F      | GACTCTTAGCTGGCACTTGGGA    | 21 | 52.4 | 59.7  | exon 5   | For all variants<br>183bp amplicon including exon coding for transmembrane;<br>139bp amplicon for soluble AGER.                                          |                                                     |
| AGER-R      | GCTGGGGTACCATTAGCTC       | 20 | 60   | 60.5  | exon 6   |                                                                                                                                                          |                                                     |
| AGERvs-F    | AGCATCATCGAACCAGGCCGA     | 20 | 55   | 59.8  | exon 8/9 |                                                                                                                                                          |                                                     |
| AGERvs-R    | TCCTGGTTTTCTGGGGCCTT      | 20 | 55   | 59.1  | exon 11  |                                                                                                                                                          | 1                                                   |
| IFI27-F     | CTTCACTGCGGCGGGAATC       | 19 | 63.2 | 59    | exon 4   | 118bp amplicon for all variants.                                                                                                                         |                                                     |
| IFI27-R     | CAGGATGAACTTGGTCAATCCG    | 22 | 50   | 57.9  | exon 5   |                                                                                                                                                          |                                                     |
| IFI27V-F    | CACATTCTCAGGAACTCTCCTC    | 23 | 47.8 | 57.4  | exon 1   |                                                                                                                                                          | Different sizes amplicons when used with IFI27-R. 1 |
| IFNGR1-F    | GTCAGAGTTAAAGCCAGGGTTG    | 22 | 50   | 57.8  | exon 3   | 122bp amplicon for all variants.<br><br>For use with IFNGR1v-R<br>For use with IFNGR1v-R<br>For use with IFNGR1v-R                                       |                                                     |
| IFNGR1-R    | GCTTCTCCTCTTTCTGATATCCA   | 24 | 25.8 | 58.8  | exon 4   |                                                                                                                                                          |                                                     |
| IFNGR1v1-F  | CAGGGTGTGAGCAGGGCTG       | 19 | 68.4 | 60.3  | exon 1   |                                                                                                                                                          | 2                                                   |
| IFNGR1v2-F  | GAAGTCACCAGAAAATAGTCTTCTC | 25 | 40   | 56.8  | exon 1   |                                                                                                                                                          | 2                                                   |
| IFNGR1v3-F  | GGACATTTCTCATTCTCAGAAC    | 24 | 41.7 | 57    | exon 1   |                                                                                                                                                          | 2                                                   |
| IFNGR1v-R   | GTTGGTGCAACTTAGCTGATCT    | 22 | 45.5 | 57.5  | exon 7   |                                                                                                                                                          |                                                     |
| IFNGR2-F    | CTACGCCCTCAGAGCTGAGCT     | 20 | 60   | 59.9  | exon 3   |                                                                                                                                                          | 144bp amplicon for all variants.                    |
| IFNGR2-R    | GTCAAAGGGAGAGGAGAACCCTG   | 22 | 54.5 | 58.6  | exon 4   |                                                                                                                                                          |                                                     |
| IFNGR2v-F   | CATGCGACCCGACGCTGCT       | 18 | 66.7 | 60.5  | exon 1   | Use with IFNGR2-R. Variant 1 is 57bp longer (547bp) than variant 2<br>Variant-specific primer for extra exon 2. Use with IFNGR2-R.                       | 1                                                   |
| IFNGR2v1-R  | GAGTAGCTGCTGAATCATTGC     | 21 | 47.6 | 55.7  | exon 2   |                                                                                                                                                          | 2                                                   |
| IL13RA1-F   | GCCACCTGTGACAAATTTGAGT    | 22 | 45   | 59.6  | exon 3   | 155bp amplicon for all variants.<br><br>Primers for variants were not synthesized because only one Refseq sequence for this gene was available.          |                                                     |
| IL13RA1-R   | CGACGAGTTTCCGGAGCTAT      | 20 | 55   | 59.6  | exon 4   |                                                                                                                                                          |                                                     |
| IL13RA2-F   | TGCTCAGATGACGGAAATTTGGA   | 22 | 45   | 60    | exon 8   | 150bp amplicon for all variants.<br><br>Only one IL13RA2 Refseq was reported and no primers for variants were synthesized.                               |                                                     |
| IL13RA2-R   | CTTACGCCAAAAGCAGACCCGG    | 20 | 55   | 59.8  | exon 9   |                                                                                                                                                          |                                                     |
| IL17RA-F    | CAACATCACCGTGGAGACCC      | 20 | 60   | 60.67 | exon 7   | 199bp amplicon for all variants.                                                                                                                         |                                                     |
| IL17RA-R    | TGCGTAGAGTGAGTGTGACG      | 20 | 55   | 59.76 | exon 8   |                                                                                                                                                          |                                                     |
| IL17RAv-F   | CACTCCGCGACTGTTTCTCTG     | 20 | 60   | 59.2  | exon 9   | To differentiate between variants with alternative exon. The amplicon sizes were 266bp for v1 and 171 bp for v2 with no exon                             | 1                                                   |
| IL17RAv-R   | GAGTAGATGATCCAGACCTTCTG   | 24 | 50   | 58.9  | exon 13  |                                                                                                                                                          | 1                                                   |
| IL17RC-F    | GACGAACATCTGCCCTTCA       | 20 | 55   | 60.04 | exon 10  | 199bp amplicon for all variants.                                                                                                                         |                                                     |
| IL17RC-R    | TGACGTTCTCCAGGAAAGC       | 20 | 55   | 59.97 | exon 11  |                                                                                                                                                          |                                                     |
| IL17RCv-F   | AGAAGGAGACCCGACTGTGAC     | 20 | 55   | 58.7  | exon 3   | Exons 6 and 7 could be variable. Expected amplicons were 270bp, 276bp and 345bp.                                                                         | 1                                                   |
| IL17RCv-R   | GCTGTGTGTGGTTGAGTTC       | 20 | 55   | 59.3  | exon 8   |                                                                                                                                                          | 1                                                   |
| IL4R-Fn     | GTGCGTGTGCCACCTGCT        | 18 | 66.7 | 60.6  | exon 5   | 149bp amplicon for all variants.<br><br>Maximal amplicon size of 1kb.                                                                                    |                                                     |
| IL4R-Rn     | GTGAACTGTCAGGTTTCTGGG     | 22 | 54.5 | 59.6  | exon 6   |                                                                                                                                                          |                                                     |
| IL4Rv-F     | ATGGGGTGGCTTGTCTGCTGG     | 20 | 60   | 60.6  | exon 3   |                                                                                                                                                          | 1                                                   |
| IL4Re10v-R  | ACCGTCTTCCCACTGTGAC       | 20 | 60   | 60    | exon 10  |                                                                                                                                                          | 1                                                   |
| MYD88-F     | CCGGATGGTGGTGGTTGT        | 18 | 61   | 59.6  | exon 4   | For all variants<br><br>Variants amplicons differ in size from 50 to 390bps.                                                                             |                                                     |
| MYD88-R     | ATGCTGGGGAACCTTTCTTCA     | 22 | 45   | 59.6  | exon 5   |                                                                                                                                                          |                                                     |
| MYD88v-F    | TGCTGGAGCTGGGACCCAG       | 19 | 68.4 | 63.89 | exon 1   |                                                                                                                                                          | 1                                                   |
| MYD88v-R    | AGACAACCACCACCATCCGG      | 20 | 60   | 62.12 | exon 4   |                                                                                                                                                          | 1                                                   |
| PDGFRA-F    | AGAGATCATTGGAGGCCGTG      | 20 | 55   | 57.4  | exon 2   | 151bp amplicon for all variants. Only recognize 3 of 5 Refseq reported variants.                                                                         |                                                     |
| PDGFRA-R    | TTAGGCTCAGCCCTGTGAGA      | 20 | 55   | 58    | exon 3   |                                                                                                                                                          |                                                     |
| PDGFRA-Fn   | GAACATTGTAACCTTGCTGGGAG   | 23 | 43.5 | 57.1  | exon 14  | Recognize all variants. 152bp amplicon for all variants.                                                                                                 |                                                     |
| PDGFRA-Rn   | CAGCTCTTTCTTTGGCTTCTCTG   | 23 | 47.8 | 58.7  | exon 15  |                                                                                                                                                          |                                                     |
| PDGFRAv1-R  | CTGAGTTATCATCTGAAAGGAGGT  | 24 | 41.7 | 56.9  | exon 17  | 400bp amplicon with PDGFRA-Fn.<br>420bp amplicon with PDGFRA-Fn.                                                                                         | 2                                                   |
| PDGFRAv2-R  | GCTTGGGCTGAGCATGAC        | 19 | 63.2 | 58.9  | exon 17  |                                                                                                                                                          | 2                                                   |
| PDGFRB-F    | CAACTTCGAGTGGACATACCC     | 21 | 2.4  | 56.6  | exon 5   | 92bp amplicon for all variants.<br><br>960bp amplicon for v1, 880bp for v2 y 954bp for v3. All using PDGF                                                |                                                     |
| PDGFRB-R    | AGCGGATGTGGTAAGGCATA      | 20 | 50   | 56.7  | exon 6   |                                                                                                                                                          |                                                     |
| PDGFRBv-F   | CTGGGAGAGGGCAGTAAGGA      | 20 | 60   | 58.1  | exon 1   |                                                                                                                                                          | 1                                                   |
| TGFBR1-Fn   | GATTATCATGAGCATGGATCCCT   | 23 | 46.5 | 56.7  | exon 5   | 155bp amplicon for all variants.<br><br>Using with TGFBR1-R: 773bp amplicon for v3, 762bp for v1, and 5                                                  |                                                     |
| TGFBR1-R    | TCTCTATGAGCAATGGCTGGC     | 21 | 52   | 58.4  | exon 6   |                                                                                                                                                          |                                                     |
| TGFBR1v-F   | CGAGATAGGCCGTTTGTATGTG    | 22 | 50   | 57.8  | exon 2   |                                                                                                                                                          | 1                                                   |
| TGFBR2-F    | GATGTGAGATTTCCACCTGTGAC   | 24 | 46   | 59    | exon 2/3 | 172bp amplicon for all variants.<br><br>Used with TGFBR2-R: 359bp for v1 and 283bp for v2.                                                               |                                                     |
| TGFBR2-R    | TTGGGTCATGGCAAAGTGT       | 20 | 50   | 60.11 | exon 3/4 |                                                                                                                                                          |                                                     |
| TGFBR2v-F   | CCGCTGCACATCGTCTGT        | 19 | 63.2 | 60.4  | Exón 1   |                                                                                                                                                          | 1                                                   |
| TGFBR3-F    | GAGCTGACGCTGTGTACGAAGA    | 22 | 55   | 62.6  | exon 13  | 165bp amplicon for all variants.<br><br>The only difference among reported TGFBR3 variants was a single aminoacid that was not tested in this study.     |                                                     |
| TGFBR3-R    | TTCTGCTTTCATGGTGGATCACAG  | 23 | 48   | 60.9  | exon 14  |                                                                                                                                                          |                                                     |
| TNC-F       | GGACAATGCGTCTCGGGC        | 18 | 66.7 | 58.3  | exon 3   | For all TNC variants. 150bp amplicon.<br><br>For amplification of variable zone including exons 11 to 17/18.<br>The amplicon ranges from 60bp up to 2kb. |                                                     |
| TNC-R       | CTCTGTGACCCGCATCTCAT      | 20 | 55   | 57.4  | exon 4   |                                                                                                                                                          |                                                     |
| TNCv-F      | GCAAGCCCGCAGCTGTGAA       | 19 | 63.2 | 61.8  | exon 10  |                                                                                                                                                          | 1                                                   |
| TNCv-R      | CTCCAGCTGACAGTAGCCGA      | 21 | 61.9 | 61.8  | exon 19  |                                                                                                                                                          | 1                                                   |
| HPRTe-F     | CCTGGCGTCTGATTAGTGAT      | 21 | 52.4 | 58.4  |          | Endogenous control: houskeeping gene                                                                                                                     |                                                     |
| HPRTe-R     | GAGCACACAGAGGGCTACAA      | 20 | 55   | 57.5  |          |                                                                                                                                                          |                                                     |
